# Supplementary material for: Tailored CVD graphene coating as a transparent and flexible gas barrier
Source: PubMed Central journal article supplement (PMC4827024; doi:10.1038/srep24143), 2016-04-11
Supplement: srep24143-s1.pdf [file srep24143-s1.pdf]

# **Tailored CVD graphene coatings as a transparent and flexible gas barrier**

*Tae Hoon Seo,<sup>1</sup> Seula Lee,<sup>1,4</sup> Hyunjin Cho,<sup>1</sup> S. Chandramohan,<sup>3</sup> Eun-Kyung Suh,<sup>3</sup> Heon Sang Lee,<sup>5</sup> Su Kang Bae,<sup>1</sup> Soo Min Kim,<sup>1</sup> Min Park,<sup>2</sup> Jae Kwan Lee,<sup>4</sup> and Myung Jong Kim<sup>1,\*</sup>*

<sup>1</sup>Soft Innovative Materials Research Center and <sup>2</sup>Photoelectronic Hybrid Research Center, Korea Institute of Science and Technology, Jeonbuk 565-905<sup>1</sup> and Seoul 136-791<sup>2</sup>, Republic of Korea

<sup>3</sup>School of Semiconductor and Chemical Engineering, Semiconductor Physics Research Center, Chonbuk National University, Jeonju 561-756, Republic of Korea

<sup>4</sup>Department of Carbon materials, Chonsun University, Gwangju 501-759, Republic of Korea

<sup>5</sup>Department of Chemical Engineering, Dong-A University, Nakdong-Daero 550, Saha-gu, Busan 604-714, Republic of Korea

---

\* **Corresponding author.** Tel.: +82-63-219-8135

E-mail: myung@kist.re.kr (M. J. Kim)

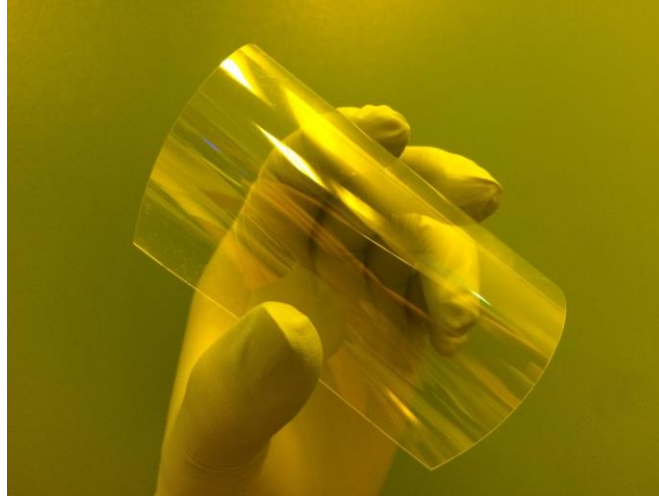

**Figure S1.** Photograph of graphene transferred on to PET film. The image showing excellent flexibility.

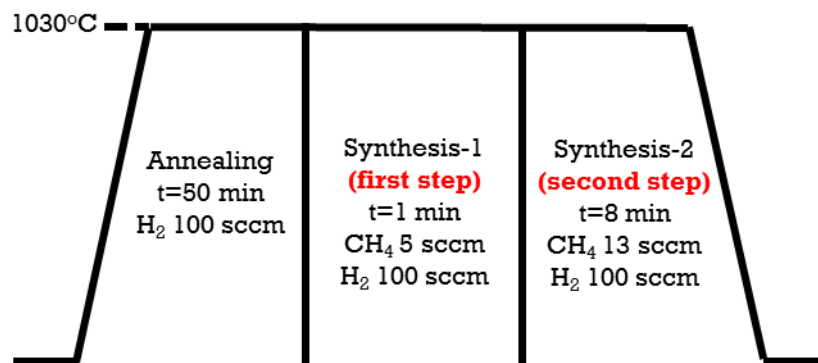

**Figure S2.** Schematic illustration of two-step growth processes.

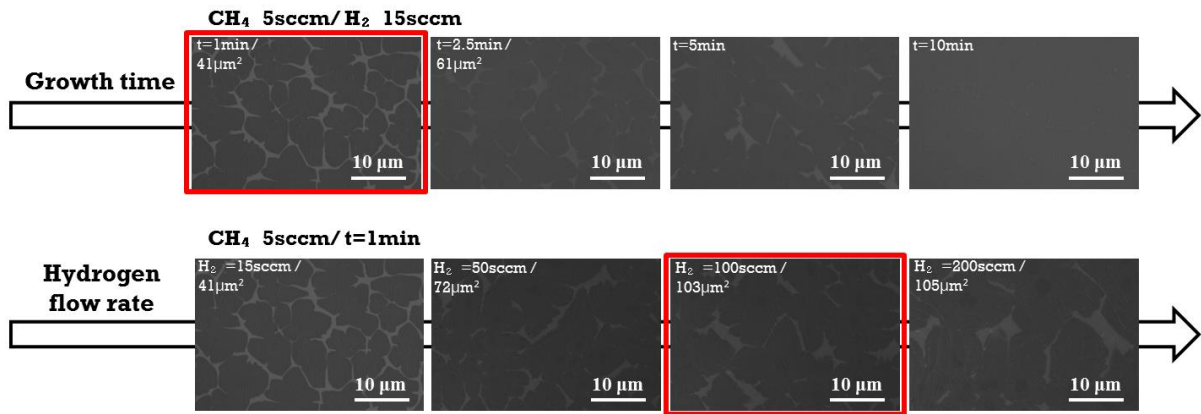

**Figure S3.** SEM images showing the effect of growth time and hydrogen flow rate at first step. The optimum condition for large domain graphene was 1 min of growth with hydrogen flow rate of 100 sccm.

| Process \ Type                 | a) 1step-w/o ECP | b) 1step-ECP | c) 2step-ECP |
|--------------------------------|------------------|--------------|--------------|
|                                | <br>RMS=78nm     | <br>RMS=78nm | <br>RMS=78nm |
| (1) Electro-chemical polishing | <br>RMS=28nm     | <br>RMS=37nm | <br>RMS=37nm |
| (2) 1step graphene growth      | <br>RMS=28nm     | <br>RMS=17nm | <br>RMS=11nm |
| (3) 2step graphene growth      |                  |              | <br>RMS=11nm |

**Figure S4.** AFM images and root mean square (RMS) roughness values of Cu foils that went through various graphene growth processes. (a) 1step-w/o ECP (b) 1step-ECP and (c) 2step-ECP, respectively. The scan size is 10 $\times$ 10  $\mu$ m<sup>2</sup>.

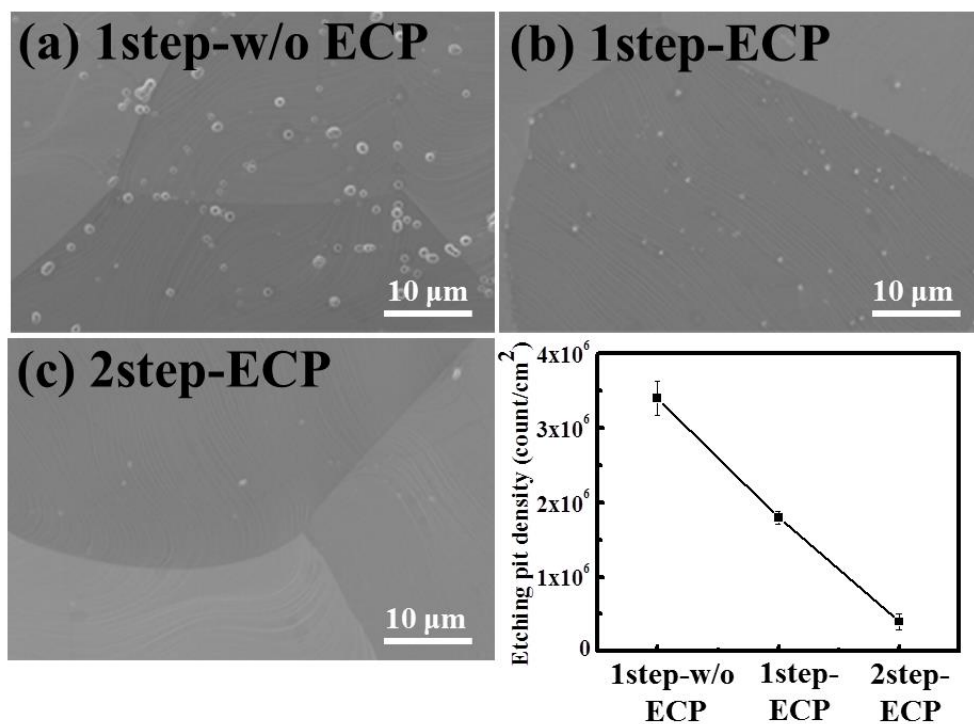

**Figure S5.** (a)-(c) SEM images of graphene surface on Cu foils after the copper etchant dropping, and (d) their etching pit density. The defect density shows a linear decrease from 1step-w/o ECP to 2step-ECP.

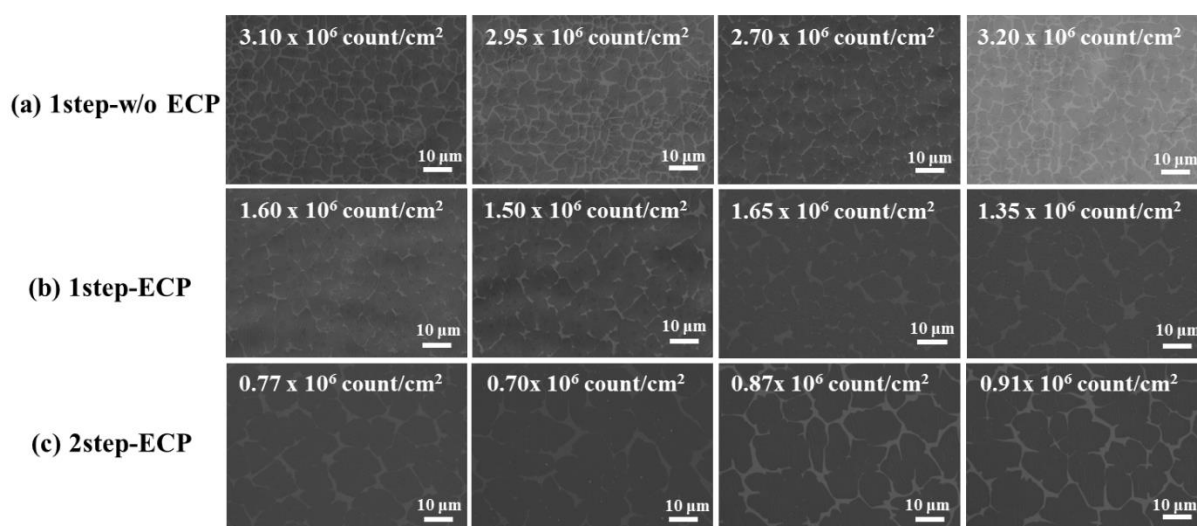

**Figure S6.** SEM images measured four times in different position of graphenes grown (a) 1step-w/o ECP, (b) 1step-ECP, and (c) 2step-ECP, respectively.

| Analysis/<br>Sample type   | Domain size         | Raman<br>2D/G ratio | Transmittance | Sheet<br>resistance  | WVTR                        | Etching pit density                        |
|----------------------------|---------------------|---------------------|---------------|----------------------|-----------------------------|--------------------------------------------|
| <b>a)1step-w/o<br/>ECP</b> | 32 $\mu\text{m}^2$  | 2.07                | 97.2757 %     | 726 $\Omega/\square$ | 1.058 g/m <sup>2</sup> -day | 4.25x10 <sup>7</sup> Count/cm <sup>2</sup> |
|                            | 28 $\mu\text{m}^2$  | 2.03                | 97.3715 %     | 702 $\Omega/\square$ | 1.066 g/m <sup>2</sup> -day | 4.87x10 <sup>7</sup> Count/cm <sup>2</sup> |
|                            | 35 $\mu\text{m}^2$  | 2.11                | 97.3829 %     | 724 $\Omega/\square$ | 1.023 g/m <sup>2</sup> -day | 4.40x10 <sup>7</sup> Count/cm <sup>2</sup> |
|                            | 35 $\mu\text{m}^2$  | 2.07                | 97.7334 %     | 752 $\Omega/\square$ | 1.086 g/m <sup>2</sup> -day | 4.71x10 <sup>7</sup> Count/cm <sup>2</sup> |
|                            | 30 $\mu\text{m}^2$  | 2.00                | 97.8395 %     | 693 $\Omega/\square$ | 1.082 g/m <sup>2</sup> -day | 4.37x10 <sup>7</sup> Count/cm <sup>2</sup> |
| <b>b)1step-ECP</b>         | 60 $\mu\text{m}^2$  | 2.00                | 97.3829 %     | 681 $\Omega/\square$ | 0.959 g/m <sup>2</sup> -day | 2.00x10 <sup>7</sup> Count/cm <sup>2</sup> |
|                            | 58 $\mu\text{m}^2$  | 2.16                | 97.4405 %     | 634 $\Omega/\square$ | 0.894 g/m <sup>2</sup> -day | 2.56x10 <sup>7</sup> Count/cm <sup>2</sup> |
|                            | 66 $\mu\text{m}^2$  | 2.32                | 97.3787 %     | 644 $\Omega/\square$ | 0.899 g/m <sup>2</sup> -day | 2.35x10 <sup>7</sup> Count/cm <sup>2</sup> |
|                            | 69 $\mu\text{m}^2$  | 2.07                | 97.3684 %     | 603 $\Omega/\square$ | 0.825 g/m <sup>2</sup> -day | 2.31x10 <sup>7</sup> Count/cm <sup>2</sup> |
|                            | 52 $\mu\text{m}^2$  | 2.19                | 97.3620 %     | 633 $\Omega/\square$ | 0.890 g/m <sup>2</sup> -day | 2.19x10 <sup>7</sup> Count/cm <sup>2</sup> |
| <b>c)2step-ECP</b>         | 100 $\mu\text{m}^2$ | 2.01                | 97.2752 %     | 388 $\Omega/\square$ | 0.654 g/m <sup>2</sup> -day | 0.25x10 <sup>7</sup> Count/cm <sup>2</sup> |
|                            | 120 $\mu\text{m}^2$ | 2.23                | 97.3299 %     | 351 $\Omega/\square$ | 0.677 g/m <sup>2</sup> -day | 0.23x10 <sup>7</sup> Count/cm <sup>2</sup> |
|                            | 112 $\mu\text{m}^2$ | 2.02                | 97.8583 %     | 399 $\Omega/\square$ | 0.664 g/m <sup>2</sup> -day | 0.31x10 <sup>7</sup> Count/cm <sup>2</sup> |
|                            | 94 $\mu\text{m}^2$  | 2.21                | 97.6690 %     | 414 $\Omega/\square$ | 0.665 g/m <sup>2</sup> -day | 0.18x10 <sup>7</sup> Count/cm <sup>2</sup> |
|                            | 99 $\mu\text{m}^2$  | 2.15                | 97.1979 %     | 355 $\Omega/\square$ | 0.657 g/m <sup>2</sup> -day | 0.20x10 <sup>7</sup> Count/cm <sup>2</sup> |

**Table S1.** The various properties summarized of the three different samples studied in this work.
